# Supplementary material for: Choosing a cellular model to study SARS-CoV-2
Source: Frontiers journal article supplement (doi:10.3389/fcimb.2022.1003608), 2022-10-21
Supplement: Table_1.pdf [file Table_1.pdf]

**SUPPLEMENTARY TABLE 1.** Potential anti-SARS-CoV-2 restriction factors and their role in impairing the viral replication cycle

| Antiviral Restriction Factor                                | Abbreviation | Step of SARS-CoV-2 cycle affected | Effect over SARS-CoV-2 replication                                                                                                                                                                                                      | References                                                             |
|-------------------------------------------------------------|--------------|-----------------------------------|-----------------------------------------------------------------------------------------------------------------------------------------------------------------------------------------------------------------------------------------|------------------------------------------------------------------------|
| Lymphocyte Antigen 6 Family Member E                        | LY6E         | Entry                             | Reduced entry of the pseudovirus expressing SARSCoV-2 S protein (VSV-S) compared to parental HEK 293T cells (>50%)                                                                                                                      | Martin-Sancho et al., 2021; Zhao et al., 2020 ; Pfaender et al., 2020. |
| Ubiquitin D                                                 | UBD          |                                   |                                                                                                                                                                                                                                         | Martin-Sancho et al., 2021                                             |
| Family With Sequence Similarity 46 Member C                 | FAM46C       |                                   |                                                                                                                                                                                                                                         |                                                                        |
| C-Type Lectin Domain Family 4 Member D                      | CLEC4D       |                                   | Reduced entry of the pseudovirus expressing SARSCoV-2 S protein (VSV-S) compared to parental HEK 293T cells (>50%) and induced the expression of interferon induced protein with tetratricopeptide repeats 2 (IFIT2)                    | Martin-Sancho et al., 2021                                             |
| E74 Like ETS Transcription Factor 1                         | ELF1         |                                   |                                                                                                                                                                                                                                         |                                                                        |
| REC8 Meiotic Recombination Protein                          | REC8         |                                   | Stymie the endosomal entry of SARS-CoV-2 in Vero E6 cells                                                                                                                                                                               | BRUCHEZ et al., 2020                                                   |
| p41 isoform of the invariant chain                          | CD74 p41     |                                   |                                                                                                                                                                                                                                         |                                                                        |
| Interferon Induced Protein with Tetratricopeptide Repeats 3 | IFIT3        | Translation and RNA replication   | Reduced SARS-CoV-2 RNA levels (>50%) in HEK 293T cells                                                                                                                                                                                  | Martin-Sancho et al., 2021                                             |
| Spermatogenesis Associated Serine Rich 2 Like               | SPATS2L      |                                   |                                                                                                                                                                                                                                         |                                                                        |
| DnaJ Heat Shock Protein Family (Hsp40) Member C6            | DNAJC6       |                                   |                                                                                                                                                                                                                                         |                                                                        |
| Regulator Of G Protein Signaling 2                          | RGSS2        |                                   |                                                                                                                                                                                                                                         |                                                                        |
| Uncharacterized/hypothetical gene                           | LOC152225    |                                   |                                                                                                                                                                                                                                         |                                                                        |
| Z-DNA Binding Protein 1                                     | ZBP1         |                                   |                                                                                                                                                                                                                                         |                                                                        |
| Beta-1,4-Galactosyltransferase 5                            | B4GALT5      |                                   |                                                                                                                                                                                                                                         |                                                                        |
| Death domain-associated protein 6                           | DAXX         |                                   | Basal expression of DAXX limited the SARS-CoV-2 replication, and DAXX over-expression further restricted infection. DAXX-mediated restriction of SARS-CoV-2 in A549-ACE2+ cells. This is antagonized by SARS-CoV-2 Papain-Like Protein. | Mac Kain et al., 2022                                                  |

|                                                          |         |                     |                                                                                                                                                                                                 |                                        |
|----------------------------------------------------------|---------|---------------------|-------------------------------------------------------------------------------------------------------------------------------------------------------------------------------------------------|----------------------------------------|
| Zinc finger antiviral protein                            | ZAP     |                     | Overexpression of ZAP-L in HEK 293T, already overexpressing ACE2, reduced viral RNA yields in a dose-dependent manner. Gene depletion leads to increased SARS-CoV-2 RNA levels in Calu-3 cells. | Nchioua et al., 2020; Lee et al., 2021 |
| Poly(ADP-Ribose) Polymerase Family Member 12             | PARP12  |                     | Gene depletion leads to increased SARS-CoV-2 RNA levels in Calu-3 cells.                                                                                                                        | Lee et al., 2021                       |
| Tripartite Motif Containing 25                           | TRIM25  |                     |                                                                                                                                                                                                 |                                        |
| CUGBP Elav-Like Family Member 1                          | CELF1   |                     |                                                                                                                                                                                                 |                                        |
| Shiftless Antiviral Inhibitor Of Ribosomal Frameshifting | SHFL    |                     |                                                                                                                                                                                                 |                                        |
| 2'-5'-oligoadenilato sintetase 1                         | OAS1    |                     | Inducible CRISPR activation of OAS1 expression by resulted in a significant decrease in the production of SARS-CoV-2 progeny 2 in A549-ACE2+ cells.                                             | Danziger et al., 2022                  |
| ER Lipid Raft Associated 1                               | ERLIN1  | Assembly            | Strongly attenuated late stages of SARS-CoV-2 replication in HEK 293T cells.                                                                                                                    | Martin-Sancho et al., 2021             |
| Reticulophagy Regulator 1                                | RETREG1 |                     | Restricted SARS-CoV-2 replication in HEK 293T cells.                                                                                                                                            |                                        |
| Fibronectin Type III Domain Containing 4                 | FNDC4   |                     |                                                                                                                                                                                                 |                                        |
| Bone Marrow Stromal Cell Antigen 2                       | BST2    | Budding and release | Identified as an inhibitor of SARS-CoV-2 replication (>53%) and a potent inhibitor of viral release (>74%) in HEK 293T cells. This is antagonized by SARS-CoV-2 Orf7.                           | Martin-Sancho et al., 2021             |
